# Supplementary material for: TOSCA – An Open-Source Finite-Volume LES Environment for Wind Farm Flows
Source: Copernicus journal article supplement (doi:10.5194/wes-2023-40), 2023-05-11
Supplement: Supplementary file 1 [file wes-2023-40-supplement.pdf]

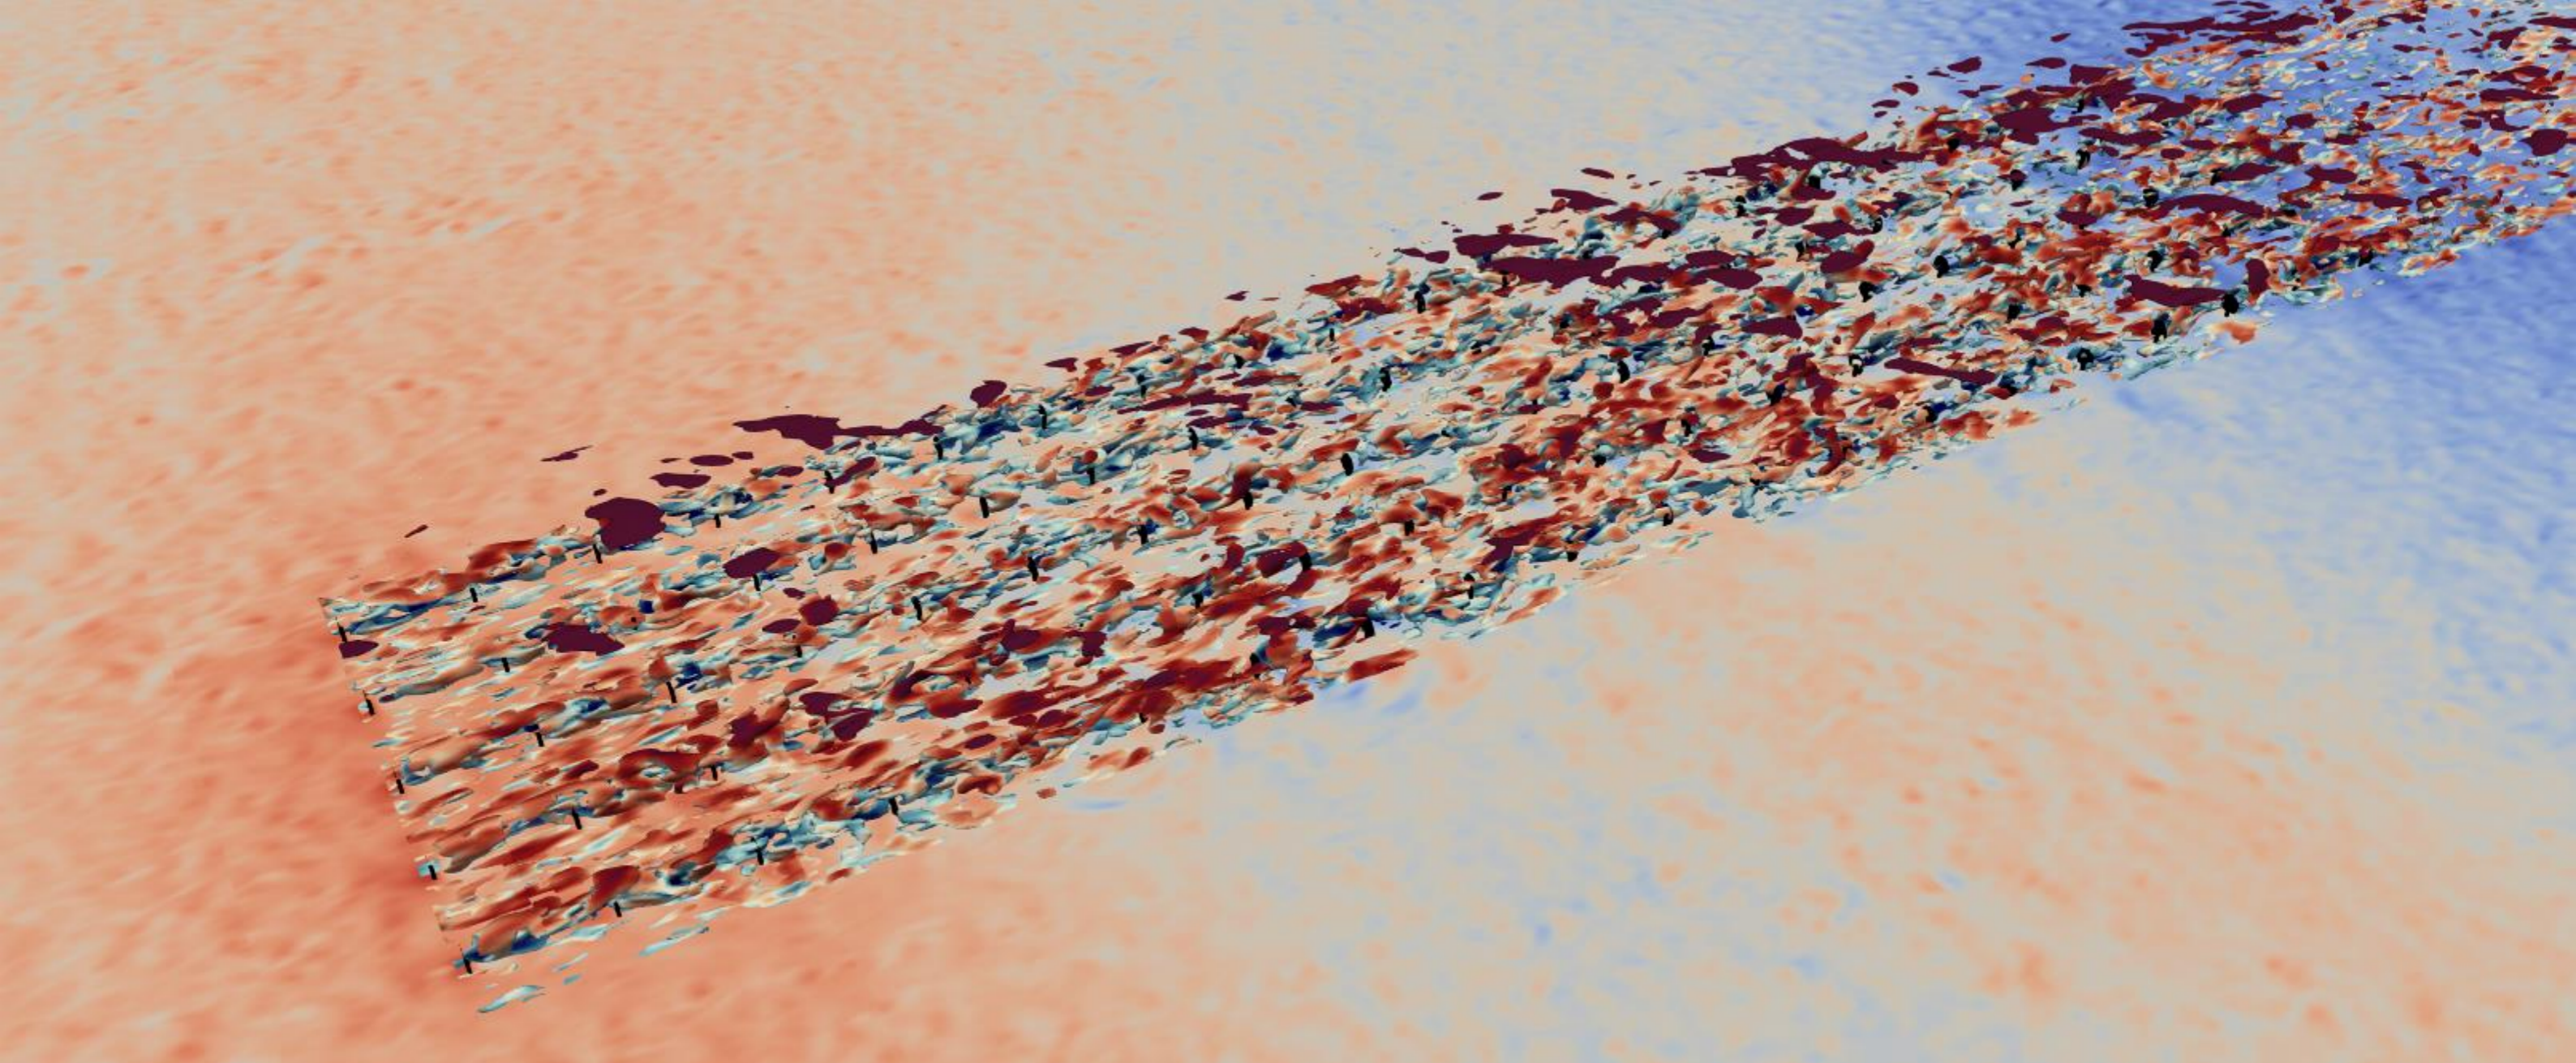

Q-criterion iso-surfaces at level 0.007, and wind farm-induced gravity wave signature visualized as background pressure perturbations on a slice at the hub-height.
